# Supplementary material
Source: publisher site journal article supplement (https://www.dovepress.com/article/475717)
Supplement: Supplementary file 1 [file get_supplementary_file.php]

**Table S1** Demographic and clinical characteristics of female and male subjects

|  | **Men** | **Women** | **p** |
| --- | --- | --- | --- |
|  | **(n=914)** | **(n=308)** |
| Age, years | 43.41±11.39 | 46.41±13.52 | 0.005 |
| BMI, kg/m2 | 26.56±3.58 | 24.04±4.18 | <0.001 |
| Neck circumference, cm | 39.42±3.19 | 33.85±3.08 | <0.001 |
| Waist circumference, cm | 94.22±10.08 | 84.35±12.48 | <0.001 |
| Hip circumference, cm | 101.08±7.51 | 96.57±7.99 | <0.001 |
| Waist–to-hip ratio | 0.93±0.06 | 0.87±0.08 | <0.001 |
| Post-menopause |  | 117(36.90) |  |
| Smoking, n(%) | 429(46.94) | 13(4.22) | <0.001 |
| Alcohol use, n(%) | 437(47.81) | 20(6.49) | <0.001 |
| OSA, n(%) | 841(92.01) | 163(52.92) | <0.001 |
| Diabetes, n(%) | 43(4.70) | 9(2.92) | 0.180 |
| Hypertension, n(%) | 373(40.81) | 73(23.70) | <0.001 |
| SBP, mmHg | 126.01±14.49 | 121.51±18.33 | <0.001 |
| DBP, mmHg | 83.18±11.05 | 75.94±11.09 | <0.001 |

Categorical variables are presented as number and percentages, and continuous variables are presented as mean ± SD. BMI, body mass index; OSA, obstructive sleep apnea; SBP, systolic blood pressure; DBP, diastolic blood pressure.

|  | **Primary snoring** | **OSA** | | |  |
| --- | --- | --- | --- | --- | --- |
|  | **Mild** | **Moderate** | **Severe** | P |
|  | (n=167) | (n=194) | (n=180) | (n=681) |  |
| Age, y | 36.89±11.59 | 43.77±13.08 | 44.81±11.05 | 45.89±11.40 | <0.001 |
| BMI, kg/m2 | 22.23±3.17 | 24.37±3.44 | 25.38±2.99 | 27.42±3.57 | <0.001 |
| Neck circumference, cm | 34.37±3.40 | 36.22±3.62 | 37.49±3.49 | 39.56±3.48 | <0.001 |
| Waist circumference, cm | 80.00±9.86 | 86.64±10.00 | 90.10±9.42 | 96.56±9.95 | <0.001 |
| Hip circumference, cm | 93.48±8.33 | 97.58±6.39 | 99.04±6.87 | 102.43±6.95 | <0.001 |
| Waist–to-hip ratio | 0.86±0.07 | 0.89±0.07 | 0.91±0.06 | 0.94±0.06 | <0.001 |
| Smoking, n (%) | 27(16.17) | 56(28.87) | 60(33.33) | 299(43.91) | <0.001 |
| Alcohol use, n (%) | 26(15.57) | 59(30.41) | 57(31.67) | 315(46.26) | <0.001 |
| Hypertension, n (%) | 21(12.57) | 41(21.13) | 47(26.11) | 337(49.49) | <0.001 |
| Diabetes, n (%) | 3(1.80) | 7(3.61) | 7(3.89) | 35(5.14) | 0.254 |
| SBP，mmHg | 116.08±14.25 | 119.41±14.90 | 123.16±15.36 | 129.11±14.83 | <0.001 |
| DBP，mmHg | 74.27±9.60 | 76.03±9.85 | 79.90±10.85 | 85.03±11.03 | <0.001 |
|  |  |  |  |  |  |
| TST, min | 432.71±64.15 | 427.44±67.76 | 433.71±61.13 | 447.73±61.72 | <0.001 |
| N1, % | 18.65±11.35 | 22.00±11.59 | 25.71±12.87 | 44.21±20.05 | <0.001 |
| N2, % | 53.92±11.53 | 53.65±12.26 | 50.97±11.26 | 36.73±17.39 | <0.001 |
| N3, % | 8.80±7.46 | 6.77±6.44 | 5.86±6.03 | 3.23±4.63 | <0.001 |
| R, % | 18.63±5.99 | 17.58±6.65 | 17.46±5.45 | 15.83±5.52 | <0.001 |
| AHI, events/h | 1.95±1.48 | 9.43±3.03 | 21.96±4.35 | 63.08±20.15 | <0.001 |
| ODI, events/h | 2.13±3.44 | 8.44±6.96 | 19.32±7.71 | 61.89±23.35 | <0.001 |
| Mean SaO2, % | 96.27±1.14 | 95.45±1.28 | 94.96±1.67 | 91.14±4.51 | <0.001 |
| Nadir SaO2, % | 89.31±6.82 | 85.77±6.93 | 79.72±10.74 | 61.92±18.91 | <0.001 |
| Arousal index, events/h | 15.39±9.39 | 17.79±10.26 | 21.32±9.97 | 42.47±21.69 | <0.001 |
|  |  |  |  |  |  |
| WBC, *10 9/L | 6.07±1.47 | 6.22±1.50 | 6.60±1.69 | 7.15±1.72 | <0.001 |
| Neutrophil, *10 9/L | 3.57±1.16 | 3.56±1.08 | 3.87±1.33 | 4.16±1.33 | <0.001 |
| Lymphocyte, *10 9/L | 1.99±0.58 | 2.10±0.63 | 2.13±0.64 | 2.35±0.65 | <0.001 |
| Monocyte, *10 9/L | 0.36±0.11 | 0.38±0.13 | 0.41±0.15 | 0.44±0.15 | <0.001 |
| Eosinophil, *10 9/L | 0.12±0.09 | 0.16±0.21 | 0.16±0.13 | 0.20±0.36 | 0.004 |
| Basophil, *10 9/L | 0.03±0.02 | 0.04±0.06 | 0.03±0.02 | 0.04±0.05 | 0.026 |
| Plate count, *10 9/L | 196.21±66.41 | 192.49±63.19 | 190.88±66.92 | 196.18±59.71 | 0.707 |
| RDW, fl | 13.34±1.17 | 13.35±1.23 | 13.34±1.01 | 13.36±1.09 | 0.994 |
| NLR | 1.95±0.97 | 1.82±0.71 | 1.97±1.11 | 1.88±0.77 | 0.271 |
| PLR | 105.85±43.35 | 97.05±39.38 | 95.31±39.72 | 88.24±32.48 | <0.001 |
| MLR | 0.19±0.07 | 0.19±0.07 | 0.20±0.09 | 0.20±0.07 | 0.299 |
| SII | 378.42±207.15 | 345.88±182.53 | 380.44±260.08 | 365.96±189.72 | 0.333 |

**Table S2** Demographic, clinical, sleep, and inflammation characteristics of primary snoring and different severities of OSA in all subjects

Categorical variables are presented as number and percentages, and continuous variables are presented as mean ± SD. OSA, obstructive sleep apnea; BMI, body mass index; SBP, systolic blood pressure; DBP, diastolic blood pressure; TST, total sleep time; N1-3, non-rapid eye movement sleep 1-3; R, rapid eye movement sleep; AHI, apnea hypopnea index; ODI, oxygen desaturation index; SaO2, oxygen saturation; WBC, white blood cell; RDW, red cell distribution width; NLR, neutrophil-to-lymphocyte ratio; PLR, platelet-to-lymphocyte ratio; MLR, monocyte-to-lymphocyte ratio; SII, systemic inflammation index.


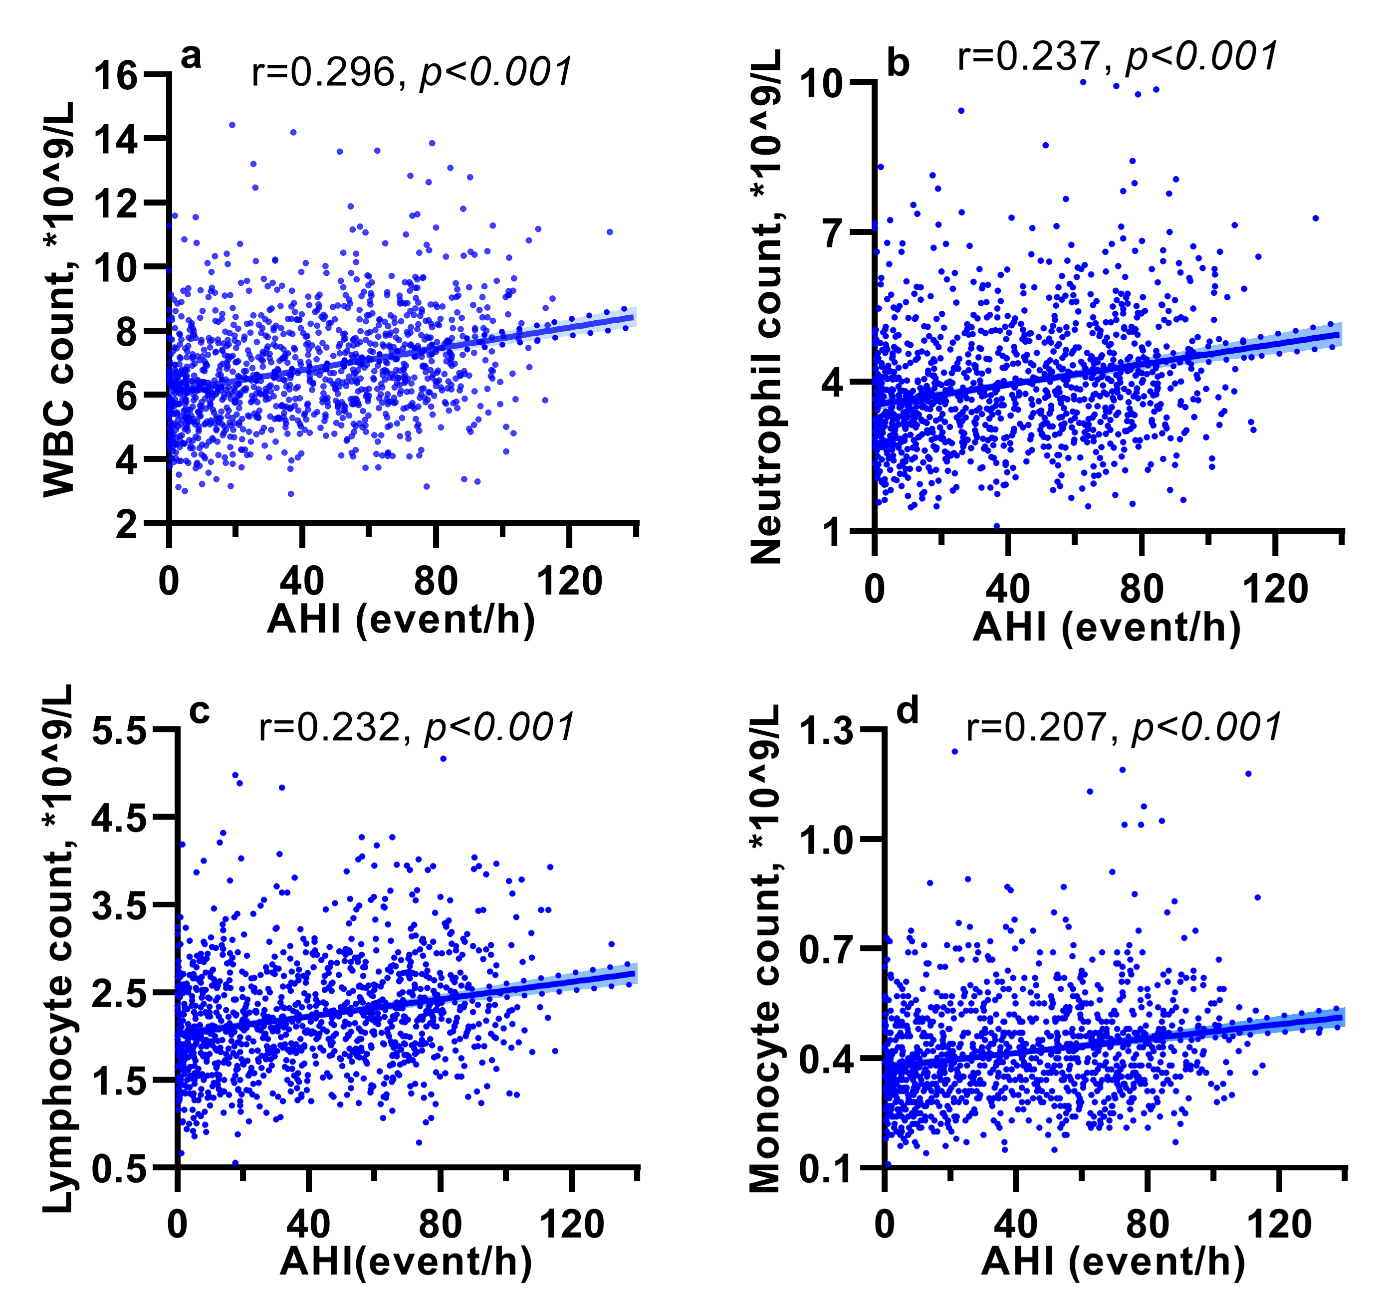


Figure S1 Scatter plots of apnea-hypopnea index vs. total white blood cell (a), neutrophil (b), lymphocyte (c), and monocyte counts (d) for all subjects. WBC, white blood cell; AHI, apnea-hypopnea index.
